# Supplementary material for: Axial and equatorial ligand effects on biomimetic cysteine dioxygenase model complexes
Source: Royal Society of Chemistry journal article supplement (doi:10.1039/c2ob25406a), 2012-01-01
Supplement: c2ob25406a.pdf [file c2ob25406a.pdf]

## Electronic Supporting Information

### **Axial and equatorial ligand effects on biomimetic cysteine dioxygenase model complexes**

**Luis E. Gonzalez-Ovalle,<sup>a</sup> Matthew G. Quesne,<sup>a</sup> Devesh Kumar,<sup>\*b</sup> David P. Goldberg,<sup>\*c</sup> and Sam P. de Visser<sup>\*a</sup>**

<sup>a</sup> Manchester Interdisciplinary Biocenter and School of Chemical Engineering and Analytical Science, University of Manchester, 131 Princess Street, Manchester M1 7DN, UK. Fax: +44 161306 5201; E-mail: [sam.devisser@manchester.ac.uk](mailto:sam.devisser@manchester.ac.uk)

<sup>b</sup> Department of Applied Physics, School of Physical Sciences, Babasaheb, Bhimrao Ambedkar University, Vidya Vihar, Rae Bareilly Road, Lucknow 226-025, India; E-mail: [dkclcre@yahoo.com](mailto:dkclcre@yahoo.com)

<sup>c</sup> Department of Chemistry, Johns Hopkins University, 3400 N. Charles Street, Baltimore, Maryland 21218, USA; E-mail: [dpg@jhu.edu](mailto:dpg@jhu.edu)

Full Gaussian Reference:

Frisch, M. J.; Trucks, G. W.; Schlegel, H. B.; Scuseria, G. E.; Robb, M. A.; Cheeseman, J. R.; Montgomery, Jr., J. A.; Vreven, T.; Kudin, K. N.; Burant, J. C.; Millam, J. M.; Iyengar, S. S.; Tomasi, J.; Barone, V.; Mennucci, B.; Cossi, M.; Scalmani, G.; Rega N.; Petersson, G. A.; Nakatsuji, H.; Hada, M.; Ehara, M.; Toyota, K.; Fukuda, R.; Hasegawa, J.; Ishida, M.; Nakajima, T.; Honda, Y.; Kitao, O.; Nakai, N.; Klene, M.; Li, X.; Knox, J. E.; Hratchian, H. P.; Cross, J. B.; Adamo, C.; Jaramillo, J.; Gomperts, R.; Stratmann, R. E.; Yazyev, O.; Austin, A. J.; Cammi, R.; Pomelli, C.; Ochterski, J. W.; Ayala, P. Y.; Morokuma, K.; Voth, G. A.; Salvador, P.; Dannenberg, J. J.; Zakrzewski, V. G.; Dapprich, S.; Daniels, A. D.; Strain, M. C.; Farkas, O.; Malick, D. K.; Rabuck, A. D.; Raghavachari, K.; Foresman, J. B.; Ortiz, J. V.; Cui, Q.; Baboul, A. G.; Clifford, S.; Cioslowski, J.; Stefanov, B. B.; Liu, G.; Liashenko, A.; Piskorz, P.; Komaromi, I.; Martin, R. L.; Fox, D. J.; Keith, T.; Al-Laham, M. A.; Peng, C. Y.; Nanayakkara, A.; Challacombe, M.; Gill, P. M. W.; Johnson, B.; Chen, W.; Wong, M. W.; Gonzalez, C.; Pople, J. A. Gaussian 03, revision C.02; Gaussian, Inc.,

**Table S1: Absolute energies, zero point energies (ZPE), free energies in the gas-phase (G) and solvent energies (Esolv) with values in au for optimized geometries, of structures A<sub>X</sub> and B<sub>X</sub>, X = OTf or Cl.**

|             | E (land12dz) | ZPE (land12dz) | G (land12dz) | E (LACVP+*) | Esolv (LACVP+*) |
|-------------|--------------|----------------|--------------|-------------|-----------------|
| <b>AOTf</b> |              |                |              |             |                 |
| singlet     | -2536.19     | 0.82           | -2535.46     | -3313.37    | -3313.39        |
| triplet     | -2536.22     | 0.82           | -2535.49     | -3313.40    | -3313.43        |
| quintet     | -2536.23     | 0.82           | -2535.51     | -3313.42    | -3313.44        |
| septet      | -2536.23     | 0.82           | -2535.51     | -3313.42    | -3313.45        |
| <b>BOtf</b> |              |                |              |             |                 |
| singlet     | -2536.17     | 0.82           | -2535.44     | -3313.35    | -3313.39        |
| triplet     | -2536.20     | 0.82           | -2535.48     | -3313.37    | -3313.40        |
| quintet     | -2536.20     | 0.81           | -2535.49     | -3313.38    | -3313.41        |
| septet      | -2536.22     | 0.81           | -2535.51     | -3313.40    | -3313.43        |
| <b>ACl</b>  |              |                |              |             |                 |
| singlet     | -1977.97     | 0.80           | -1977.25     | -2812.03    | -2812.06        |
| triplet     | -1977.99     | 0.80           | -1977.28     | -2812.05    | -2812.08        |
| quintet     | -1978.01     | 0.79           | -1977.30     | -2812.07    | -2812.11        |
| septet      | -1978.01     | 0.79           | -1977.30     | -2812.08    | -2812.11        |
| <b>BCl</b>  |              |                |              |             |                 |
| singlet     | -1977.96     | 0.80           | -1977.25     | -2812.03    | -2812.06        |
| triplet     | -1977.99     | 0.80           | -1977.28     | -2812.06    | -2812.08        |
| quintet     | -1978.00     | 0.79           | -1977.26     | -2812.02    | -2812.09        |
| septet      | -1978.02     | 0.79           | -1977.32     | -2812.10    | -2812.12        |

**Table S2: Group spin densities and charges of optimized geometries**

**Table S2a: A<sub>Cl</sub>/B<sub>Cl</sub> UB3LYP/BS1 results.**

| Spin densities        |      |      |      |       |       |       | Charges |       |       |       |       |      |
|-----------------------|------|------|------|-------|-------|-------|---------|-------|-------|-------|-------|------|
|                       | Fe   | O1   | O2   | Cl    | SPh   | BIP   | Fe      | O1    | O2    | Cl    | SPh   | BIP  |
| <b>A<sub>Cl</sub></b> |      |      |      |       |       |       |         |       |       |       |       |      |
| Singlet               | 0.00 | 0.00 | 0.00 | 0.00  | 0.00  | 0.00  | -0.08   | -0.17 | -0.18 | -0.34 | -0.01 | 0.78 |
| Triplet               | 0.98 | 0.31 | 0.60 | -0.02 | 0.17  | -0.04 | -0.11   | -0.23 | -0.18 | -0.34 | -0.03 | 0.89 |
| Quintet               | 3.46 | 0.21 | 0.40 | 0.03  | -0.22 | 0.12  | 0.14    | -0.20 | -0.14 | -0.37 | -0.04 | 0.60 |
| Septet                | 3.76 | 0.80 | 0.90 | 0.12  | 0.31  | 0.11  | 0.10    | -0.09 | -0.06 | -0.38 | -0.19 | 0.61 |
| <b>B<sub>Cl</sub></b> |      |      |      |       |       |       |         |       |       |       |       |      |
| Singlet               | 0.00 | 0.00 | 0.00 | 0.00  | 0.00  | 0.00  | -0.16   | -0.14 | -0.22 | -0.32 | -0.11 | 0.94 |
| Triplet               | 1.02 | 0.47 | 0.61 | 0.02  | 0.00  | -0.12 | -0.15   | -0.17 | -0.18 | -0.27 | -0.11 | 0.88 |
| Quintet               | 2.02 | 0.58 | 0.65 | -0.03 | 0.89  | -0.11 | 0.22    | -0.21 | -0.20 | -0.35 | 0.02  | 0.52 |
| Septet                | 3.69 | 0.97 | 0.96 | 0.14  | 0.20  | 0.04  | 0.12    | 0.00  | -0.03 | -0.34 | -0.25 | 0.50 |

**Table S2b: A<sub>Cl</sub>/B<sub>Cl</sub> UB3LYP/BS2 results.**

| Spin densities        |      |      |      |       |       |       | Charges |       |       |       |       |       |
|-----------------------|------|------|------|-------|-------|-------|---------|-------|-------|-------|-------|-------|
|                       | Fe   | O1   | O2   | Cl    | SPh   | BIP   | Fe      | O1    | O2    | Cl    | SPh   | BIP   |
| <b>A<sub>Cl</sub></b> |      |      |      |       |       |       |         |       |       |       |       |       |
| singlet               | 0.00 | 0.00 | 0.00 | 0.00  | 0.00  | 0.00  | -1.59   | 0.80  | 0.26  | -0.54 | -0.33 | 1.40  |
| triplet               | 0.91 | 0.33 | 0.59 | -0.02 | 0.20  | -0.01 | -1.45   | 0.45  | 0.20  | -0.85 | 0.19  | 1.46  |
| quintet               | 3.07 | 0.19 | 0.37 | 0.02  | 0.02  | 0.33  | 1.79    | 0.49  | 0.37  | -0.78 | -1.06 | -0.82 |
| septet                | 3.35 | 0.79 | 0.89 | 0.12  | 0.34  | 0.50  | 2.66    | 0.00  | 0.19  | -0.70 | -1.64 | -0.51 |
| <b>B<sub>Cl</sub></b> |      |      |      |       |       |       |         |       |       |       |       |       |
| singlet               | 0.00 | 0.00 | 0.00 | 0.00  | 0.00  | 0.00  | -2.73   | 1.24  | -0.07 | -1.65 | -0.04 | 3.25  |
| triplet               | 1.10 | 0.45 | 0.57 | 0.00  | 0.02  | -0.14 | -2.57   | 0.75  | -0.08 | -1.73 | -0.02 | 3.65  |
| quintet               | 3.47 | 0.53 | 0.55 | 0.15  | -1.05 | 0.34  | 2.13    | 0.26  | -0.10 | -2.12 | -0.02 | -0.14 |
| septet                | 3.52 | 0.99 | 0.97 | 0.14  | 0.16  | 0.21  | 0.95    | -0.03 | 0.16  | -1.64 | -0.27 | 0.84  |

**Table S2c: A<sub>OTf</sub>/B<sub>OTf</sub> UB3LYP/BS1 results.**

| Spin densities         |       |      |      |       |       |       | Charges |       |       |       |       |      |
|------------------------|-------|------|------|-------|-------|-------|---------|-------|-------|-------|-------|------|
|                        | Fe    | O1   | O2   | Otf   | SPh   | BIP   | Fe      | O1    | O2    | Otf   | SPh   | BIP  |
| <b>A<sub>OTf</sub></b> |       |      |      |       |       |       |         |       |       |       |       |      |
| singlet                | 0.00  | 0.00 | 0.00 | 0.00  | 0.00  | 0.00  | 0.16    | -0.15 | -0.17 | -0.73 | 0.04  | 0.85 |
| triplet                | 0.87  | 0.35 | 0.58 | -0.01 | 0.23  | -0.02 | 0.07    | -0.17 | -0.21 | -0.72 | 0.03  | 0.99 |
| quintet                | 3.57  | 0.20 | 0.30 | 0.04  | -0.25 | 0.13  | 0.38    | -0.16 | -0.11 | -0.75 | -0.01 | 0.65 |
| septet                 | 3.74  | 0.82 | 0.93 | 0.05  | 0.33  | 0.13  | 0.37    | -0.07 | -0.04 | -0.76 | -0.16 | 0.65 |
| <b>B<sub>OTf</sub></b> |       |      |      |       |       |       |         |       |       |       |       |      |
|                        | Fe    | O1   | O2   | Otf   | SPh   | BIP   | Fe      | O1    | O2    | Otf   | SPh   | BIP  |
| singlet                | 0.00  | 0.00 | 0.00 | 0.00  | 0.00  | 0.00  | 0.14    | -0.14 | -0.14 | -0.70 | -0.10 | 0.94 |
| triplet                | -0.07 | 0.45 | 0.61 | 0.00  | 1.00  | 0.01  | 0.43    | -0.19 | -0.22 | -0.72 | 0.01  | 0.70 |
| quintet                | 2.06  | 0.55 | 0.64 | 0.01  | 1.00  | -0.24 | 0.51    | -0.21 | -0.21 | -0.71 | 0.01  | 0.60 |
| septet                 | 3.69  | 0.53 | 0.61 | 0.08  | 1.00  | 0.09  | 0.72    | -0.26 | -0.22 | -0.73 | 0.01  | 0.48 |

**Table S2d: A<sub>OTf</sub>/B<sub>OTf</sub> UB3LYP/BS2 results.**

| Spin densities         |      |      |      |       |      |       | Charges |      |       |       |       |       |
|------------------------|------|------|------|-------|------|-------|---------|------|-------|-------|-------|-------|
|                        | Fe   | O1   | O2   | Otf   | SPh  | BIP   | Fe      | O1   | O2    | Otf   | SPh   | BIP   |
| <b>A<sub>OTf</sub></b> |      |      |      |       |      |       |         |      |       |       |       |       |
| singlet                | 0.00 | 0.00 | 0.00 | 0.00  | 0.00 | 0.00  | -2.17   | 1.03 | 0.21  | 0.07  | -0.96 | 1.81  |
| triplet                | 0.87 | 0.35 | 0.57 | -0.01 | 0.28 | -0.06 | -2.67   | 1.06 | -0.01 | 0.40  | -1.22 | 2.43  |
| quintet                | 3.30 | 0.15 | 0.20 | 0.03  | 0.01 | 0.30  | 1.45    | 0.49 | 0.36  | 0.04  | -1.66 | -0.68 |
| septet                 | 3.46 | 0.83 | 0.95 | 0.04  | 0.32 | 0.40  | 1.24    | 0.03 | 0.28  | -0.11 | -1.30 | -0.14 |
| <b>B<sub>OTf</sub></b> |      |      |      |       |      |       |         |      |       |       |       |       |
| singlet                | 0.00 | 0.00 | 0.00 | 0.00  | 0.00 | 0.00  | -3.58   | 0.88 | 0.15  | 0.37  | -0.49 | 2.67  |
| triplet                | 0.00 | 0.48 | 0.54 | -0.01 | 1.00 | -0.01 | 0.00    | 0.00 | 0.00  | 0.00  | 0.00  | 2.70  |
| quintet                | 2.31 | 0.55 | 0.57 | -0.04 | 1.00 | -0.39 | -0.40   | 0.05 | -0.08 | 0.07  | -0.04 | 0.40  |
| septet                 | 3.72 | 0.54 | 0.54 | 0.08  | 1.01 | 0.12  | -0.12   | 0.14 | -0.10 | -0.02 | -0.09 | 0.19  |

**Table S3: Absolute energies, zero point energies (ZPE), free energies in the gas-phase (G) and solvent energies (Esolv) with values in au for optimized geometries, of structures A<sub>Sph</sub> and C<sub>Cl,Cl</sub>.**

|                          | E (land12dz) | ZPE (6-311g) | G (6-311g) | E (6-311+g*) | Esolv (6-311+g*) |
|--------------------------|--------------|--------------|------------|--------------|------------------|
| <b>C<sub>Cl,Cl</sub></b> |              |              |            |              |                  |
| singlet                  | -1751.25     | 0.70         | -1750.63   | -2642.34     | -2642.38         |
| triplet                  | -1751.24     | 0.70         | -1750.62   | -2642.36     | -2642.43         |
| quintet                  | -1751.27     | 0.70         | -1750.65   | -2642.42     | -2642.45         |
| <b>A<sub>Sph</sub></b>   |              |              |            |              |                  |
| singlet                  | -2204.70     | 0.89         | -2203.90   | -2981.68     | -2981.71         |
| triplet                  | -2204.73     | 0.89         | -2203.93   | -2981.71     | -2981.74         |
| quintet                  | -2204.74     | 0.89         | -2203.95   | -2981.73     | -2981.76         |

**Table S4: Group spin densities and charges of optimized geometries.**

|                          | Spin densities |       |       |       |       |       | Charge |       |       |       |       |      |
|--------------------------|----------------|-------|-------|-------|-------|-------|--------|-------|-------|-------|-------|------|
|                          | Fe             | O1    | O2    | Cl1   | Cl2   | CDO   | Fe     | O1    | O2    | Cl1   | Cl2   | CDO  |
| <b>C<sub>Cl,Cl</sub></b> |                |       |       |       |       |       |        |       |       |       |       |      |
| singlet                  | 1.74           | -0.71 | -0.89 | 0.00  | -0.03 | -0.11 | 0.00   | -0.10 | -0.04 | -0.36 | -0.28 | 0.78 |
| triplet                  | 2.07           | -0.05 | -0.06 | 0.10  | 0.03  | -0.09 | 0.08   | -0.03 | -0.04 | -0.37 | -0.32 | 0.68 |
| quintet                  | 3.80           | 0.01  | -0.40 | 0.16  | 0.24  | 0.18  | 0.26   | -0.18 | -0.08 | -0.37 | -0.27 | 0.64 |
| <b>A<sub>Sph</sub></b>   |                |       |       |       |       |       |        |       |       |       |       |      |
| singlet                  | 0.00           | 0.00  | 0.00  | 0.00  | 0.00  | 0.00  | -0.13  | -0.16 | -0.23 | -0.24 | -0.08 | 0.83 |
| triplet                  | 0.79           | 0.45  | 0.60  | 0.02  | 0.23  | -0.09 | -0.20  | -0.18 | -0.20 | -0.17 | -0.09 | 0.84 |
| quintet                  | 3.22           | 0.33  | 0.55  | -0.08 | -0.15 | 0.12  | 0.07   | -0.22 | -0.22 | -0.19 | -0.05 | 0.61 |

**Table S5. Absolute and relative energies, zero point energies and free energies of UB3LYP/BS1 optimized geometries of  $^7[\text{Fe}^{\text{III}}\text{O}_2(\text{LN}_3\text{S})]$ . M7 = septet spin state. Absolute energies in au and relative energies in kcal mol $^{-1}$ .**

(a)

| B1 -> LACVP |              |              |              |              |                  |              |
|-------------|--------------|--------------|--------------|--------------|------------------|--------------|
| Multip      | E            | E+ZPE        | G            | $\Delta E^a$ | $\Delta E+ZPC^a$ | $\Delta G^a$ |
| M7          | -1646.868998 | -1646.517425 | -1646.577093 | -0.91        | -1.76            | -4.62        |

<sup>a</sup> with respect to  $^1\text{A}$ .

(b)

| B1 -> LACVP (Solv = Chlorobenzene) |                  |                              |                                  |
|------------------------------------|------------------|------------------------------|----------------------------------|
| Multip                             | $E_{\text{sol}}$ | $\Delta(E+E_{\text{sol}})^a$ | $\Delta(E+ZPC+E_{\text{sol}})^a$ |
| M7                                 | -39.09           | -0.94                        | -1.79                            |

<sup>a</sup> with respect to  $^1\text{A}$ .

(c)

| B2 -> LACV3P+* |              |              |              |                              |                  |                                  |
|----------------|--------------|--------------|--------------|------------------------------|------------------|----------------------------------|
| Multip         | E            | E+ZPE        | $\Delta E^a$ | $\Delta(E+E_{\text{sol}})^a$ | $\Delta E+ZPC^a$ | $\Delta(E+ZPC+E_{\text{sol}})^a$ |
| M7             | -1647.470770 | -1647.119197 | -6.07        | -6.11                        | -6.92            | -6.95                            |

<sup>a</sup> with respect to  $^1\text{A}$ .

**Table S6. Group spin densities and group charges of UB3LYP/BS1 optimized geometries of  $^7[\text{Fe}^{\text{III}}\text{O}_2(\text{LN}_3\text{S})]$ . M7 = septet spin state.**

|    | Spin densities |      |      |      |      | Charges |      |       |      |      |
|----|----------------|------|------|------|------|---------|------|-------|------|------|
|    | Fe             | O1   | O2   | S    | Rest | Fe      | O1   | O2    | S    | Rest |
| M7 | 3.63           | 0.96 | 0.82 | 0.36 | 0.23 | 0.72    | 0.01 | -0.15 | 0.10 | 0.32 |

**Table S7. Group spin densities and group charges of UB3LYP/BS2//UB3LYP/BS1 calculations of  $^7[\text{Fe}^{\text{III}}\text{O}_2(\text{LN}_3\text{S})]$ . M7 = septet spin state.**

|    | Spin densities |      |      |      |      | Charges |      |      |       |      |
|----|----------------|------|------|------|------|---------|------|------|-------|------|
|    | Fe             | O1   | O2   | S    | Rest | Fe      | O1   | O2   | S     | Rest |
| M7 | 3.66           | 0.97 | 0.72 | 0.33 | 0.31 | 0.02    | 0.34 | 0.35 | -0.48 | 0.77 |

**Table S8. Group spin densities and group charges of UB3LYP/BS1 single point in solvent chlorobenzene calculations of  $^7[\text{Fe}^{\text{III}}\text{O}_2(\text{LN}_3\text{S})]$ . M7 = septet spin state.**

|    | Spin densities |      |      |      |      | Charges |       |       |       |      |
|----|----------------|------|------|------|------|---------|-------|-------|-------|------|
|    | Fe             | O1   | O2   | S    | Rest | Fe      | O1    | O2    | S     | Rest |
| M7 | 3.68           | 0.95 | 0.82 | 0.31 | 0.24 | 0.77    | -0.01 | -0.14 | -0.01 | 0.39 |

**Table S9. Important bond distances and angles of UB3LYP/BS1 optimized geometries of  $^7[\text{Fe}^{\text{III}}\text{O}_2(\text{LN}_3\text{S})]$ . M7 = septet spin state.**

|    | Fe-N <sub>av</sub> | Fe-S  | Fe-O2 | O1-O2 | O1-S  | Ang(FeO2O1) |
|----|--------------------|-------|-------|-------|-------|-------------|
| M7 | 2.166              | 2.336 | 2.075 | 1.278 | 4.364 | 179.9       |

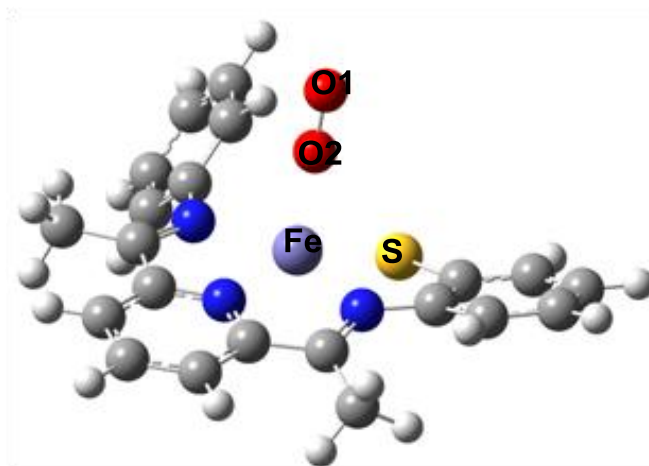

**Figure S1. Optimized geometry of  $^7[\text{Fe}^{\text{III}}\text{O}_2(\text{LN}_3\text{S})]$  at UB3LYP/BS1 level of theory.**

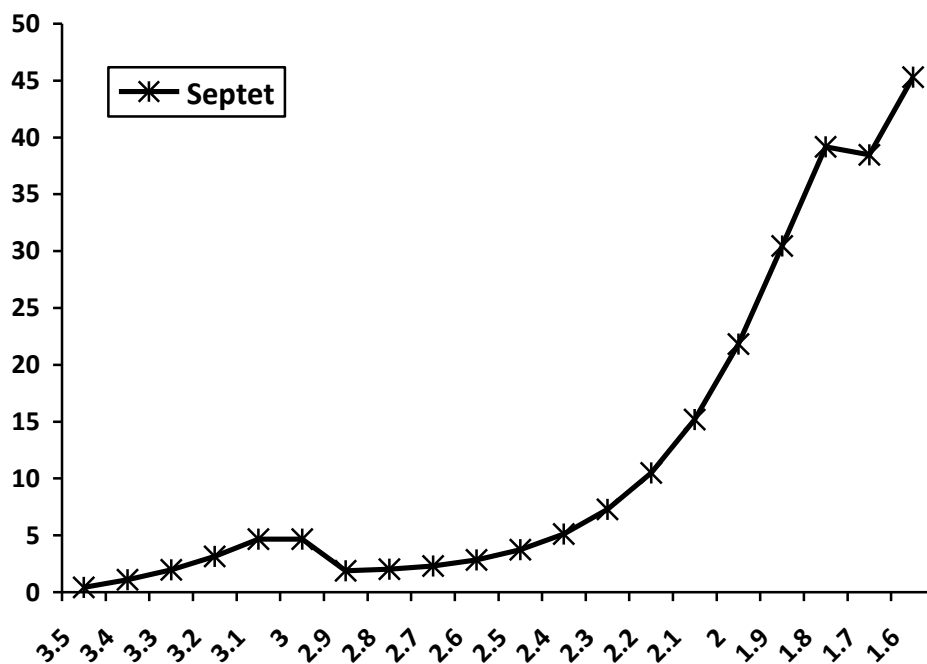

**Figure S2. Geometry scan for the S-O bond formation step starting from  $^7[\text{Fe}^{\text{III}}\text{O}_2(\text{LN}_3\text{S})]$  at the left-hand-side. Each point represents a full geometry optimization with fixed S-O distance at UB3LYP/BS1.**

**Table S10. Absolute (in au) and relative (in kcal mol<sup>-1</sup>) energies of optimized UB3LYP-D/BS1 and subsequent single point UB3LYP-D/BS2 calculations.**

|                        | E(B1, au)   | E(B2, au)   | ΔE(B1) | ΔE+ZPE(B1) | ΔE(B2) | ΔE+ZPE(B2) |
|------------------------|-------------|-------------|--------|------------|--------|------------|
| <b>A<sub>OTf</sub></b> |             |             |        |            |        |            |
| triplet                | -2534.65186 | -3311.73613 | 16.33  | 18.50      | 29.10  | 31.27      |
| quintet                | -2534.67789 | -3311.78251 | 0.00   | 0.00       | 0.00   | 0.00       |
| septet                 | -2534.67638 | -3311.77972 | 0.95   | 0.65       | 1.75   | 1.46       |
| <b>B<sub>OTf</sub></b> |             |             |        |            |        |            |
| triplet                | -2534.58061 | -3311.66188 | 61.04  | 61.03      | 75.70  | 75.68      |
| quintet                | -2534.60754 | -3311.71911 | 44.14  | 43.55      | 39.79  | 39.19      |
| septet                 | -2534.63194 | -3311.72624 | 28.83  | 27.42      | 35.31  | 33.90      |
| <b>A<sub>Cl</sub></b>  |             |             |        |            |        |            |
| triplet                | -1976.63141 | -2810.60531 | 25.48  | 27.16      | 37.50  | 39.19      |
| quintet                | -1976.67201 | -2810.66507 | 0.00   | 0.00       | 0.00   | 0.00       |
| septet                 | -1976.67173 | -2810.66429 | 0.18   | -0.11      | 0.49   | 0.21       |
| <b>B<sub>Cl</sub></b>  |             |             |        |            |        |            |
| triplet                | -1976.63585 | -2810.61118 | 22.69  | 24.58      | 33.82  | 35.71      |
| quintet                | -1976.63689 | -2810.64399 | 22.04  | 20.96      | 13.23  | 12.15      |
| septet                 | -1976.68242 | -2810.67811 | -6.53  | -7.55      | -8.18  | -9.21      |

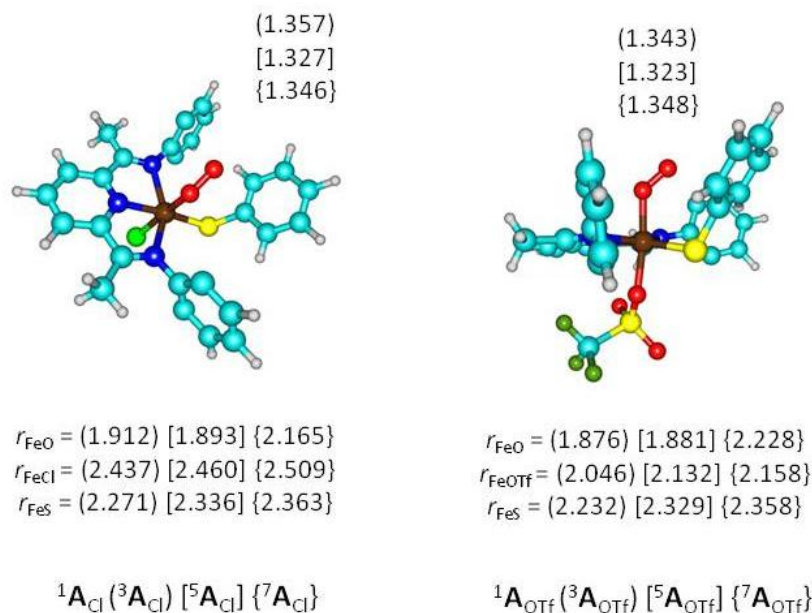

**Figure S3.** B3LYP-D/B1 optimized geometries of <sup>3,5,7</sup>A<sub>Cl</sub> (left-hand-side) and <sup>3,5,7</sup>A<sub>OTf</sub> (right-hand-side) with bond lengths in angstroms. H-atoms and isopropyl groups have been hidden.



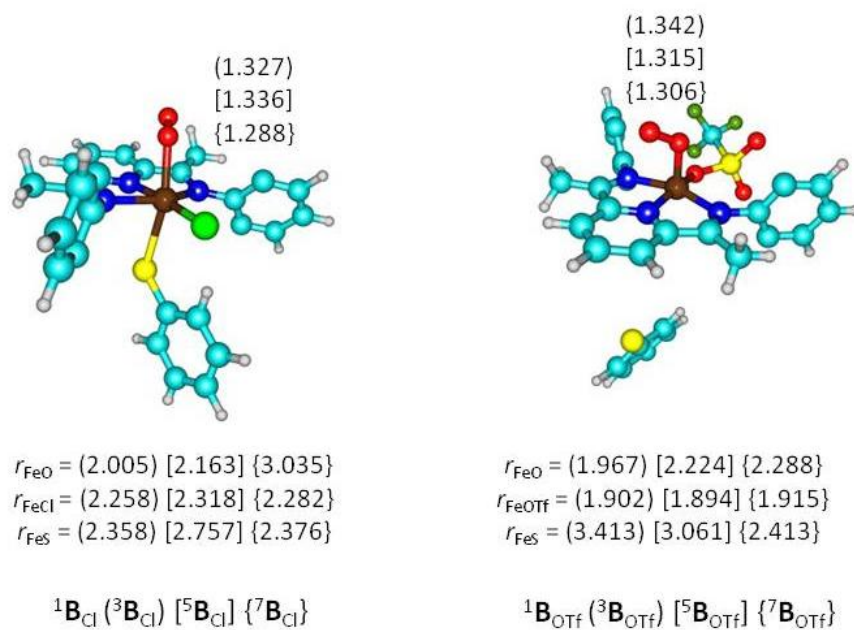

**Figure S4.** B3LYP-D/B1 optimized geometries of  ${}^{3,5,7}\mathbf{B}_{\text{Cl}}$  (left-hand-side) and  ${}^{3,5,7}\mathbf{B}_{\text{OTf}}$  (right-hand-side) with bond lengths in angstroms. H-atoms and isopropyl groups have been hidden.

## Cartesian Coordinates:

### Ac1,5

|    |              |              |              |
|----|--------------|--------------|--------------|
| Fe | -0.044338000 | -0.513358000 | 0.236930000  |
| C  | -2.439307000 | -2.057915000 | -0.924660000 |
| C  | -1.207044000 | -2.843571000 | -1.244090000 |
| C  | -1.233620000 | -4.128224000 | -1.822274800 |
| H  | -2.174850000 | -4.603062000 | -2.072629000 |
| C  | -0.017945000 | -4.791241000 | -2.059439000 |
| H  | -0.013713000 | -5.785387000 | -2.496647000 |
| C  | 1.191101000  | -4.163919000 | -1.719614000 |
| H  | 2.135061000  | -4.667628000 | -1.888467000 |
| C  | 1.154809000  | -2.874451000 | -1.148709000 |
| C  | 2.381779000  | -2.117862000 | -0.752171000 |
| C  | -3.778766000 | -2.640010000 | -1.322961000 |
| H  | -4.593189000 | -1.969632000 | -1.046019000 |
| H  | -3.936813000 | -3.602368000 | -0.818760000 |
| C  | -3.824018000 | -2.817832000 | -2.404701000 |
| C  | 3.719282000  | -2.801795000 | -0.944736000 |
| H  | 3.871355000  | -3.091556000 | -1.991263000 |
| H  | 3.757414000  | -3.715413000 | -0.337044000 |
| H  | 4.540102000  | -2.151710000 | -0.641164000 |
| C  | -3.367167000 | -0.021781000 | -0.016055000 |
| C  | -3.813410000 | 0.881157000  | -1.024023000 |
| C  | -4.865450000 | 1.763240000  | -0.696415000 |
| H  | -5.221187000 | 2.461952000  | -1.449272000 |
| C  | -5.457590000 | 1.758427000  | 0.574604000  |
| H  | -6.267261000 | 2.447497000  | 0.802893000  |
| C  | -5.000294000 | 0.859093000  | 1.548818000  |
| H  | -5.460297000 | 0.854187000  | 2.533304000  |
| C  | -3.950923000 | -0.044136000 | 1.281086000  |
| C  | -3.224431000 | 0.932783000  | -2.440837000 |
| H  | -2.343797000 | 0.285544000  | -2.481204000 |
| C  | -4.251400000 | 0.431891000  | -3.493415000 |
| H  | -4.599564000 | -0.586343000 | -3.277347000 |
| H  | -3.800067000 | 0.434009000  | -4.494898000 |
| H  | -5.134888000 | 1.083287000  | -3.523312000 |
| C  | -2.735302000 | 2.357022000  | -2.810065000 |
| H  | -3.568375000 | 3.071710000  | -2.852946000 |
| H  | -2.255580000 | 2.343461000  | -3.797755000 |
| H  | -2.001016000 | 2.721062000  | -2.085783000 |
| C  | -3.518813000 | -1.038357000 | 2.362797000  |
| C  | -2.592445000 | -1.526625000 | 2.048586000  |
| C  | -3.205830000 | -0.341763000 | 3.710144000  |
| H  | -2.434128000 | 0.424036000  | 3.577793000  |
| H  | -2.826875000 | -1.081358000 | 4.426702000  |
| H  | -4.097344000 | 0.127811000  | 4.148953000  |
| C  | -4.596499000 | -2.140691000 | 2.558296000  |
| H  | -5.543183000 | -1.712121000 | 2.915315000  |
| H  | -4.253080000 | -2.872619000 | 3.300918000  |
| H  | -4.805384000 | -2.677963000 | 1.622917000  |
| C  | 3.340809000  | -0.066968000 | 0.079310000  |
| C  | 3.831372000  | -0.039061000 | 1.415311000  |
| C  | 4.912730000  | 0.819184000  | 1.705703000  |
| H  | 5.298592000  | 0.853176000  | 2.720735000  |
| C  | 5.494851000  | 1.623463000  | 0.716305000  |
| H  | 6.327479000  | 2.278192000  | 0.962123000  |
| C  | 4.997529000  | 1.577533000  | -0.593960000 |
| C  | 5.451215000  | 2.202281000  | -1.358383000 |
| C  | 3.916498000  | 0.741278000  | -0.945839000 |
| C  | 3.273788000  | -0.939455000 | 2.521358000  |
| H  | 2.330369000  | -1.375887000 | 2.184202000  |
| C  | 2.955215000  | -0.158222000 | 3.819756000  |
| H  | 3.860492000  | 0.251067000  | 4.289597000  |
| H  | 2.475840000  | -0.830229000 | 4.542650000  |
| H  | 2.261078000  | 0.663846000  | 3.616551000  |
| C  | 4.254144000  | -2.106661000 | 2.825501000  |
| H  | 5.208888000  | -1.729952000 | 3.217971000  |
| H  | 4.473164000  | -2.702110000 | 1.929321000  |
| H  | 3.816507000  | -2.775754000 | 3.577591000  |
| C  | 3.448101000  | 0.723518000  | -2.408944000 |
| C  | 2.471020000  | 0.232187000  | -2.457609000 |
| C  | 4.441439000  | -0.069766000 | -3.304684000 |
| H  | 5.426171000  | 0.416352000  | -3.314220000 |
| H  | 4.073826000  | -0.105287000 | -4.339234000 |
| H  | 4.585087000  | -1.099439000 | -2.958139000 |
| C  | 3.265386000  | 2.149164000  | -2.989944000 |
| H  | 4.226293000  | 2.671325000  | -3.090883000 |
| H  | 2.601877000  | 2.748080000  | -2.361247000 |
| H  | 2.816768000  | 2.087025000  | -3.990138000 |
| N  | 2.206028000  | -0.928236000 | -0.249071000 |
| N  | -0.028134000 | -2.251166000 | -0.933620000 |
| N  | -2.262260000 | -0.925660000 | -0.309751000 |
| S  | -0.078799000 | 1.246288000  | 1.815396000  |
| C  | -0.006299000 | 2.883967000  | 1.025593000  |
| C  | -1.189505000 | 3.643219000  | 0.850042000  |
| C  | -2.145525000 | 3.212597000  | 1.135258000  |
| H  | -1.123192000 | 4.940151000  | 0.315384000  |
| H  | -2.036107000 | 5.517625000  | 0.187074000  |

|    |              |              |              |
|----|--------------|--------------|--------------|
| C  | 0.121865000  | 5.494475000  | -0.053942000 |
| H  | 0.169937000  | 6.500517000  | -0.465377000 |
| C  | 1.299875000  | 4.740827000  | 0.111808000  |
| H  | 2.261631000  | 5.160652000  | -0.174247000 |
| C  | 1.238789000  | 3.440048000  | 0.644330000  |
| H  | 2.143786000  | 2.853672000  | 0.771293000  |
| O  | -0.240781000 | 0.709008000  | -1.356059000 |
| O  | 0.543488000  | 1.738030000  | -1.683714000 |
| Cl | -0.094841000 | -2.123802000 | 2.066046000  |

### Ac1,7

|    |              |              |              |
|----|--------------|--------------|--------------|
| Fe | -0.031617000 | -0.617272000 | 0.346964000  |
| C  | -2.425304000 | -2.018341000 | -0.939860000 |
| C  | -1.211600000 | -2.796406000 | -1.327658000 |
| C  | -1.248133000 | -4.028242000 | -2.011936000 |
| H  | -2.191980000 | -4.477949000 | -2.296717000 |
| C  | -0.035274000 | -4.670932000 | -2.314267000 |
| H  | -0.038260000 | -5.623065000 | -2.836715000 |
| C  | 1.181301000  | -4.078992000 | -1.933348000 |
| H  | 2.121756000  | -4.568663000 | -2.156869000 |
| C  | 1.152139000  | -2.844648000 | -1.253179000 |
| C  | 2.369404000  | -2.111102000 | -0.797205000 |
| C  | -3.778742000 | -2.592910000 | -1.297835000 |
| H  | -4.585318000 | -1.944197000 | -0.955289000 |
| H  | -3.899723000 | -3.576539000 | -0.825472000 |
| C  | -3.876647000 | -2.729874000 | -2.381852000 |
| H  | 3.717302000  | -2.748291000 | -1.055598000 |
| H  | 3.876246000  | -2.921666000 | -2.126880000 |
| H  | 3.766317000  | -3.721610000 | -0.549768000 |
| H  | 4.528142000  | -2.123319000 | -0.680618000 |
| C  | -3.329217000 | -0.004349000 | 0.039094000  |
| C  | -3.851652000 | 0.866447000  | -0.962127000 |
| C  | -4.892869000 | 1.745028000  | -0.592592000 |
| H  | -5.303246000 | 2.420538000  | -1.338858000 |
| C  | -5.406496000 | 1.767398000  | 0.711248000  |
| H  | -6.208071000 | 2.454532000  | 0.971251000  |
| C  | -4.879980000 | 0.898009000  | 1.676985000  |
| H  | -5.278518000 | 0.914316000  | 2.687515000  |
| C  | -3.837009000 | 0.000836000  | 1.368578000  |
| C  | -3.356769000 | 0.900577000  | -2.415564000 |
| H  | -2.479737000 | 0.252042000  | -2.508893000 |
| C  | -4.444944000 | 0.378934000  | -3.395507000 |
| H  | -4.774743000 | -0.636546000 | -3.145496000 |
| H  | -4.057435000 | 0.370877000  | -4.423205000 |
| C  | -5.330824000 | 1.027050000  | -3.377163000 |
| C  | -2.915347000 | 2.325569000  | -2.840905000 |
| H  | -3.766160000 | 3.019804000  | -2.852538000 |
| H  | -2.491040000 | 2.301030000  | -3.853292000 |
| C  | -2.154295000 | 2.726776000  | -2.165487000 |
| C  | -3.336276000 | -0.965666000 | 2.443503000  |
| H  | -2.405529000 | -1.426910000 | 2.104376000  |
| C  | -3.010413000 | -0.254056000 | 3.779096000  |
| H  | -2.296001000 | 0.560711000  | 3.618030000  |
| H  | -2.555346000 | -0.971816000 | 4.473157000  |
| H  | -3.908901000 | 0.155708000  | 4.261259000  |
| C  | -4.362277000 | -2.110466000 | 2.670925000  |
| H  | -5.315634000 | -1.719742000 | 3.053244000  |
| H  | -3.966602000 | -2.825561000 | 3.403376000  |
| H  | -4.572961000 | -2.659149000 | 1.742579000  |
| C  | 3.293324000  | -0.113266000 | 0.193840000  |
| C  | 3.727707000  | -0.096111000 | 1.549104000  |
| C  | 4.788346000  | 0.766510000  | 1.894603000  |
| H  | 5.131619000  | 0.791776000  | 2.924995000  |
| C  | 5.403652000  | 1.588298000  | 0.939652000  |
| H  | 6.218859000  | 2.247539000  | 1.227934000  |
| H  | 4.962085000  | 1.553866000  | -0.390197000 |
| H  | 5.441289000  | 2.192644000  | -1.127572000 |
| C  | 3.905566000  | 0.710700000  | -0.796666000 |
| C  | 3.133384000  | -1.019264000 | 2.614324000  |
| H  | 2.204225000  | -1.451343000 | 2.234897000  |
| H  | 2.767530000  | -0.269694000 | 3.918302000  |
| H  | 3.653781000  | 0.128306000  | 4.431958000  |
| H  | 2.263835000  | -0.960354000 | 4.606253000  |
| H  | 2.080969000  | 0.557758000  | 3.708100000  |
| H  | 4.099706000  | -2.198479000 | 2.915597000  |
| C  | 5.046754000  | -1.837836000 | 3.340884000  |
| H  | 4.336147000  | -2.773158000 | 2.009565000  |
| H  | 3.637920000  | -2.883211000 | 3.638267000  |
| C  | 3.491232000  | 0.728339000  | -2.275534000 |
| H  | 2.585664000  | 0.125489000  | -2.398267000 |
| C  | 4.599794000  | 0.119960000  | -3.179970000 |
| H  | 5.518258000  | 0.718783000  | -3.126431000 |
| H  | 4.269582000  | 0.106589000  | -4.227433000 |
| H  | 4.857203000  | -0.905122000 | -2.888526000 |
| C  | 3.154224000  | 2.160928000  | -2.765855000 |
| H  | 4.046963000  | 2.800499000  | -2.772140000 |









|   |              |              |              |
|---|--------------|--------------|--------------|
| H | 4.940200000  | 3.970876000  | 1.069723000  |
| H | 5.475979000  | 2.955920000  | 3.296167000  |
| H | 4.547747000  | 0.707001000  | 3.882693000  |
| H | 3.135698000  | -0.525272000 | 2.248842000  |
| O | 0.094637000  | -0.300617000 | -2.319905000 |
| O | -1.071254000 | -0.104524000 | -3.005956000 |

**C<sub>Cl,Cl,5</sub>**

|    |              |              |              |
|----|--------------|--------------|--------------|
| Fe | -0.001018000 | -0.462589000 | 0.075919000  |
| C  | -2.419160000 | -2.051220000 | -0.946209000 |
| C  | -1.207516000 | -2.854860000 | -1.304138000 |
| C  | -1.255578000 | -4.145486000 | -1.870229000 |
| H  | -2.203840000 | -4.618269000 | -2.096180000 |
| C  | -0.047313000 | -4.816552000 | -2.125567000 |
| H  | -0.059686000 | -5.812774000 | -2.558154000 |
| C  | 1.176603000  | -4.203090000 | -1.807004000 |
| H  | 2.111861000  | -4.720693000 | -1.983542000 |
| C  | 1.160220000  | -2.910985000 | -1.242935000 |
| C  | 2.387764000  | -2.165515000 | -0.819285000 |
| C  | -3.775873000 | -2.649803000 | -1.247195000 |
| H  | -4.577736000 | -1.964429000 | -0.971567000 |
| H  | -3.905428000 | -3.579617000 | -0.677146000 |
| H  | -3.873989000 | -2.894528000 | -2.311974000 |
| C  | 3.729121000  | -2.829567000 | -1.040473000 |
| H  | 3.866767000  | -3.105051000 | -2.093207000 |
| H  | 3.790546000  | -3.749244000 | -0.442978000 |
| H  | 4.546638000  | -2.172730000 | -0.742024000 |
| C  | -3.317207000 | 0.002864000  | -0.052296000 |
| C  | -3.813733000 | 0.871125000  | -1.067539000 |
| C  | -4.885503000 | 1.726325000  | -0.735951000 |
| H  | -5.280388000 | 2.396003000  | -1.495192000 |
| C  | -5.444104000 | 1.737796000  | 0.549614000  |
| H  | -6.268055000 | 2.408285000  | 0.781407000  |
| C  | -4.928173000 | 0.885399000  | 1.534747000  |
| H  | -5.355181000 | 0.898797000  | 2.534090000  |
| C  | -3.859293000 | 0.006550000  | 1.261853000  |
| C  | -3.253614000 | 0.918854000  | -2.495672000 |
| H  | -2.329255000 | 0.333980000  | -2.531721000 |
| C  | -4.252561000 | 0.307074000  | -3.517193000 |
| H  | -4.506943000 | -0.732435000 | -3.276105000 |
| H  | -3.823166000 | 0.328497000  | -4.527956000 |
| H  | -5.188704000 | 0.880262000  | -3.537712000 |
| C  | -2.890964000 | 2.365908000  | -2.920285000 |
| H  | -3.786219000 | 2.995424000  | -3.008979000 |

|    |              |              |              |
|----|--------------|--------------|--------------|
| H  | -2.391337000 | 2.355725000  | -3.897782000 |
| H  | -2.209490000 | 2.827456000  | -2.199852000 |
| C  | -3.351199000 | -0.912556000 | 2.374044000  |
| H  | -2.471595000 | -1.453231000 | 2.017503000  |
| C  | -2.885830000 | -0.104444000 | 3.611722000  |
| H  | -2.115996000 | 0.621993000  | 3.329922000  |
| H  | -2.451662000 | -0.784658000 | 4.355233000  |
| H  | -3.717658000 | 0.434294000  | 4.086720000  |
| C  | -4.423972000 | -1.962991000 | 2.768910000  |
| H  | -5.324468000 | -1.485228000 | 3.178501000  |
| H  | -4.021703000 | -2.638726000 | 3.534836000  |
| H  | -4.732655000 | -2.571389000 | 1.906943000  |
| C  | 3.330516000  | -0.155731000 | 0.130185000  |
| C  | 3.823896000  | -0.211481000 | 1.462134000  |
| C  | 4.906536000  | 0.626932000  | 1.801667000  |
| H  | 5.294374000  | 0.597910000  | 2.816526000  |
| C  | 5.486342000  | 1.490641000  | 0.863451000  |
| H  | 6.319570000  | -2.128859000 | 1.147283000  |
| C  | 4.981558000  | 1.530394000  | -0.443728000 |
| H  | 5.429343000  | 2.204793000  | -1.168491000 |
| C  | 3.897487000  | 0.720121000  | -0.840533000 |
| C  | 3.245181000  | -1.137894000 | 2.533975000  |
| H  | 2.409071000  | -1.699954000 | 2.111407000  |
| C  | 2.661702000  | -0.323625000 | 3.717657000  |
| H  | 3.439240000  | 0.258949000  | 4.231115000  |
| H  | 2.203616000  | -1.003496000 | 4.446925000  |
| H  | 1.886070000  | 0.364747000  | 3.365855000  |
| C  | 4.301451000  | -2.160750000 | 3.030644000  |
| H  | 5.149898000  | -1.662294000 | 3.518648000  |
| H  | 4.701124000  | -2.765107000 | 2.203924000  |
| H  | 3.846489000  | -2.841879000 | 3.761559000  |
| C  | 3.406714000  | 0.807691000  | -2.291874000 |
| H  | 2.454440000  | 0.275190000  | -2.373610000 |
| C  | 4.416326000  | 0.140677000  | -3.267680000 |
| H  | 5.384632000  | 0.657518000  | -3.239783000 |
| H  | 4.038187000  | 0.189200000  | -4.297802000 |
| H  | 4.596302000  | -0.912694000 | -3.019218000 |
| C  | 3.145601000  | 2.272774000  | -2.727090000 |
| H  | 4.077351000  | 2.851836000  | -2.774795000 |
| H  | 2.459394000  | 2.771591000  | -2.036361000 |
| H  | 2.690100000  | 2.290973000  | -3.725714000 |
| N  | 2.203053000  | -1.004565000 | -0.257467000 |
| N  | -0.015766000 | -2.279618000 | -1.028003000 |
| N  | -2.211202000 | -0.901651000 | -0.368853000 |
| O  | 0.056909000  | 0.382546000  | -1.755580000 |
| O  | 0.093330000  | 1.640091000  | -2.158141000 |
| Cl | -0.075542000 | -2.092912000 | 1.913165000  |
| Cl | 0.012283000  | 1.529030000  | 1.192735000  |
